# Supplementary material for: Kinetic Analysis of 4-Nitrophenol Reduction by “Water-Soluble” Palladium Nanoparticles
Source: PubMed Central journal article supplement (PMC7353196; doi:10.3390/nano10061169), 2020-06-15
Supplement: nanomaterials-10-01169-s001.pdf [file nanomaterials-10-01169-s001.pdf]

## Supplementary Information

### Calculating the surface area of the Pd nanoparticles:

The total surface area of the catalysts used in the catalytic reaction ( $S_T (Pd)_{Nano}$ ) was calculated based on the number of Pd atoms per nanoparticles and median radius ( $r_{nano}$ ) of the Pd nanoparticles.

Nanoparticles of Pd are considered as a compact sphere of radius  $r_{nano}$ . The surface area of total nanoparticles:

$$S_T (Pd)_{Nano} = S (Pd)_{Nano} (Pd)_{Nano}$$

With  $S (Pd)_{Nano}$  the surface area of a Pd nano and  $(Pd)_{Nano}$  The number of nanoparticles:

$$S (Pd)_{Nano} = 4\pi r_{nano}^2$$

$$(Pd)_{Nano} = \frac{(Pd)_{Atom}}{n(Pd)_{Atom}}$$

$n(Pd)_{Atom}$  are the number of Pd atoms per nanoparticles and  $(Pd)_{Atom}$  are the total amount of Pd atoms for a solution of known concentration [Pd]:

$$(Pd)_{Atom} = [Pd] \times NA$$

With  $NA$  the Avogadro constant ( $NA = 6.02214076 \times 10^{23} \text{ mol}^{-1}$ )

Each crystalline lattice containing 4 Pd atoms, so the number of Pd atoms per nanoparticles:

$$n(Pd)_{Atom} = 4 \frac{V_{sphere}}{V_{lattice}}$$

With  $V_{lattice}$  the crystalline lattice volume:

$$n(Pd)_{Atom} = \frac{16 \pi r_{nano}^3}{3 V_{lattice}}$$

### General preparation of the Pd nanoparticles:

In a 10 mL vial, 2 mL of distilled water, 80  $\mu\text{L}$  of a water solution of  $\text{Na}_2\text{PdCl}_4$  (20 mM) and 180  $\mu\text{L}$  of bisphosphonic acid solution in water (40 mM HMBP aromatic) are mixed. Then 40  $\mu\text{L}$  of a solution of sodium ascorbate (17.6  $\text{mg mL}^{-1}$ ) were added and the mixture was heated on a microwave apparatus (Monowave 300, Anton Paar GmbH, Graz, Austria) for 30 min at 80  $^\circ\text{C}$  using a ruby thermometer (step 1: heat as fast as possible to 100  $^\circ\text{C}$  and step 2: hold at 100  $^\circ\text{C}$  for 30 min with the stirring speed being 1200 rpm for both steps).

### Simulation of Langmuir-Hinshelwood equation:

The concentration of 4-nitrophenol as the function of reaction time ( $C_{4-Nip,exp}$ ) was simulated by a numerical solution of equation 1 by one Matlab routine. This Matlab routine was used to calculate the theoretical 4-nitrophenol concentration ( $C_{4-Nip,ther}$ ) as the function of reaction time for given values of the true rate constant  $k$  and the Langmuir-Hinshelwood parameters  $K_{4-Nip}$  and  $K_{BH4^-}$ . These values are changed and calculation was repeated until the agreement of the experimental concentration of 4-nitrophenol to theoretical values obtained from equation 1.

#### MatLab Routine:

```
function [t,X]=main
global X time y ;
v=load('Exp1.txt')
time=v(:,1);
y=v(:,2);
%K_4Nip0 =5800;
%K_BH40= 2.3;
k0 = 0.015;
M0=[ k0 ]
fminsearch(@param,M0);
end
%%%%%%%%%%%%%%%%%%%%%%%%%%%%%%%%%%%%%%%%%%%%%%%%%%%%%%%%%%%%%%%%%%%%%%%%
function [S] = param(Mp)
global K_4Nip K_BH4 k n time y
k = Mp(1);
%K_4Nip = Mp(2);
%K_BH4 = Mp(3);
% The initial C_4-Nip value (mol/L)
Xo = [7.38*10^-5];
[t,X] = ode45(@fun,time,Xo);
ysim=X(:,1);
S=0;
for j=1:length(y)
S=S+(y(j)-ysim(j))^2;
end
S
K_4Nipa=K_4Nip
K_BH4a=K_BH4
ka=k
na=n
figure(1)
%plot the results
plot(time,y,'--',t,X(:,1))
legend('C4-Nip,exp','C4-Nip,ther');
ylabel('C4-Nip(mol/L)');
xlabel('time(s)');
dlmwrite('sol.dat',[t,X],');
end
%%%%%%%%%%%%%%%%%%%%%%%%%%%%%%%%%%%%%%%%%%%%%%%%%%%%%%%%%%%%%%%%%%%%%%%%
function [dx_dt]= fun(t,x)
global K_4Nip K_BH4 k n
C_BH4=1.5*10^-2;
K_BH4=1.5;
```

```
a = K_BH4*C_BH4;
%k = 0.0053;
S=0.002453465;
n = 1;
b=4200;
K_4Nip=b
kS=k*S;
if x(1)>=0
dx_dt(1)=-((kS *(a)* (b* x(1))^n)/(1+ a +((b* x(1))^n))^2);
end
if x(1)<0
dx_dt(1)=0;
x(1)=0;
end
dx_dt = (dx_dt)';
end
```
